# Supplementary material for: DOPO-Modified Cellulose Microsphere: Preparation and Application for Selective Adsorption U(VI) under Acidic Solutions
Source: Research Square preprint supplement (doi:10.21203/rs.3.rs-1035340/v1), 2021-11-09
Supplement: Supplementary file 1 [file a157d94f86f89d489cf7e577.docx]

**Supporting Information on**

**Facile preparation of novel DOPO functionalized cellulose microshphere as adsorbent for uranium adsorption with ultrahigh selectivity**

Di Wen1, 2†, Cong Xie3†, Manman Zhang1, 2, Zhen Dong1, Maolin Zhai4, Long Zhao1*

1 State Key Laboratory of Advanced Electromagnetic Engineering and Technology, School of Electrical and Electronic Engineering, Huazhong University of Science and

Technology, Wuhan 430074, China

2 School of Chemistry and Chemical Engineering, Huazhong University of Science and Technology, Wuhan 430074, China

3 Non-power Nuclear Technology Research and Development Center, Hubei University of Science and Technology, Xianning 437100, China

4 Beijing National Laboratory for Molecular Sciences, Radiochemistry and Radiation Chemistry Key Laboratory of Fundamental Science, Key Laboratory of Polymer Chemistry and Physics of the Ministry of Education, College of Chemistry and Molecular Engineering, Peking University, Beijing 100871, China

† refer to equal contribution

Corresponding author.

E-mail addresses: [ryuuchou@hotmail.com](mailto:ryuuchou@hotmail.com) (Long Zhao), [zhaolong@hust.edu.cn](mailto:zhaolong@hust.edu.cn) (Long Zhao)





**Fig. S1** pHpzc of the t-DOPOR





**Fig. S2** Relative proportion of U(VI) as a function of solution pH.(C0(U(VI)) = 20 mg/L)





**Fig. S3** high-resolution XPS spectra of U 4f for the t-DOPOR-U

**Fig. S4** FTIR image for DOPO-R before and after adsorption with adsorption U(VI)

**Table S1** Kinetic parameter of U (VI) individual adsorption onto t-DOPOR

| Resin | Experimental data  qe(mg g-1) | | Pseudo first-order equation  qe(mg g-1) k1(h-1) R2 | | | Pseudo-Second-order equation  qe(mg g-1) k2(g mg-1min-1) R2 | | |
| --- | --- | --- | --- | --- | --- | --- | --- | --- |
| t-DOPOR | | 20.85 | 20.20 | 0.6565 | 0.9615 | 21.21 | 0.05621 | 0.9997 |

**Table S2** Isotherm parameter of U (VI) individual adsorption onto t-DOPOR

| Resin | Experimental data  qe(mg g-1) | | Langmuir model  qe(mg g-1) k1(h-1) R2 | | | Freundlich model  qe(mg g-1) k2(g mg-1min-1) R2 | | |
| --- | --- | --- | --- | --- | --- | --- | --- | --- |
| t-DOPOR | | 67.08 | 69.49 | 0.12 | 0.9921 | 20.07 | 3.891 | 0.9850 |

**Table S3** Thermodynamic parameters for the adsorption of U(VI) on t-DOPOR

|  | △H(KJ/mol) | △S(J/mol K) |  | △G(KJ/monl) | | | |
| --- | --- | --- | --- | --- | --- | --- | --- |
| T=293 K | T=298 K | T=303 K | T=313 K T=323 K |  |
| t-DOPOR | 2.87 | 85.22 | -1.15 | -1.57 | -2.00 | -2.85 -3.70 |  |

**Table S4** t-DOPOR for removing trace amount of U(VI) in practical application

|  |  | pH | C0 | Ce | E(%) |
| --- | --- | --- | --- | --- | --- |
| contaminated pure water |  | 3 | 6.37 | 0.096 | 98.49 |
| simulated groundwater | | 7.6 | 24.3 | <0.04 | >99.8 |
